# Supplementary material for: Selective Photocatalytic Transformation of Lignin to Aromatic Chemicals by Crystalline Carbon Nitride in Water–Acetonitrile Solutions
Source: MDPI journal article supplement (doi:10.3390/ijerph192315707), 2022-11-25
Supplement: s1 [file s1]

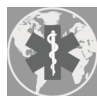

## Supplementary Information

# Selective Photocatalytic Transformation of Lignin to Aromatic Chemicals by Crystalline Carbon Nitride in Water–Acetonitrile Solutions

Meirou Huang <sup>1,2</sup>, Huiqin Guo <sup>1,2,\*</sup>, Zhenxing Zeng <sup>3,\*</sup>, Hong Xiao <sup>3</sup>, Hong Hu <sup>1,2</sup>, Liu He <sup>1,2</sup>, Kexin Li <sup>1,2</sup>, Xiaoming Liu <sup>1,2</sup> and Liushui Yan <sup>1,2,\*</sup>

<sup>1</sup> Key Laboratory of Jiangxi Province for Persistent Pollutants Control and Resources Recycle, Nanchang Hangkong University, Nanchang 330063, China

<sup>2</sup> Jiangxi Provincial Experimental Teaching Demonstration Center of Environmental Science and Engineering, Nanchang Hangkong University, Nanchang 330063, China

<sup>3</sup> College of Environmental Science, Sichuan Agricultural University, Chengdu 611130, China

\* Correspondence: guohuiqin@nchu.edu.cn (H.G.); zzx207@hotmail.com (Z.Z.); yanliushui@nchu.edu.cn (L.Y.)

## Supplementary Text

### 1. Analysis Methods

The lignin model compound (2-phenoxy-1-phenylethanol) and the resulting product after its conversion were qualitatively analyzed by GC-MS and quantitatively analyzed by HPLC (external standard method). The specific detection conditions of GC-MS are as follows: DB-17MS column (30 m × 0.25 mm × 0.25 μm), detector temperature is 280 °C, the injection volume is 1.0 μL, injection port temperature is 250 °C. High purity He is used as the carrier gas and the flow rate is 1.0 mL/min, without splitting. Heating procedure: initial temperature 50 °C, hold for 3 min; then the temperature was raised at 10 °C/min for 2 min, maintained for 5 min; after that, raising at a warming rate of 2 °C/min for 5 minutes, maintained for 2 minutes; finally, raising at a temperature rate of 15 °C/min for 12 minutes and maintained for 2 minutes. The specific detection conditions for HPLC are as follows: the injection volume is 10 μL; the mobile phase was a mixture of water(A) and acetonitrile(B); the gradient elution was as follows: 0-10 min (40-60% B), 10-20 min(60-80% B) at a flow rate of 1.0 mL/min; the column was Welch Ultimate XB-C18 (30 cm × 4.6 mm × 250 μm) with a column temperature of 25 °C and a detection wavelength of 230 nm [1]. The conversion rate, product yield and C<sub>α</sub>-C<sub>β</sub> bond cleavage selectivity of the lignin model compound were calculated from Equations (S1)–(S3).

$$\text{Conversion of lignin model compounds (C)} = \frac{N_0 - N_t}{N_0} \times 100\% \quad (\text{S1})$$

$$\text{Product (X) yield} = \frac{N_x}{N_0} \times 100\% \quad (\text{S2})$$

$$\text{C}_\alpha\text{-C}_\beta \text{ bond cleavage selectivity} = \frac{N_2}{C} \times 100\% \quad (\text{S3})$$

where C represents lignin model compounds conversion; N<sub>0</sub> (mmol) is the initial molar amount of the lignin model compound; N<sub>t</sub> (mmol) is the molar amount of the lignin model compound in the sample to be measured at the sampling time; N<sub>x</sub> (mmol) is the molar amount of the product (X) from lignin model compounds; N<sub>2</sub> (mmol) is the molar amount of the benzaldehyde.

**Citation:** Huang, M.; Guo, H.; Zeng, Z.; Xiao, H.; Hu, H.; He, L.; Liu, X.; Yan, L. Selective Photocatalytic Transformation of Lignin to Aromatic Chemicals by Crystalline Carbon Nitride in Water–Acetonitrile Solutions. *Int. J. Environ. Res. Public Health* **2022**, *19*, x. <https://doi.org/10.3390/ijerph192315707>

Academic Editor: Paul B. Tchounwou

Received: 9 November 2022

Accepted: 23 November 2022

Published: 25 November 2022

**Publisher's Note:** MDPI stays neutral with regard to jurisdictional claims in published maps and institutional affiliations.

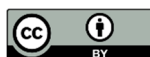

**Copyright:** © 2022 by the authors. Submitted for possible open access publication under the terms and conditions of the Creative Commons Attribution (CC BY) license (<https://creativecommons.org/licenses/by/4.0/>).

## Supplementary Figures

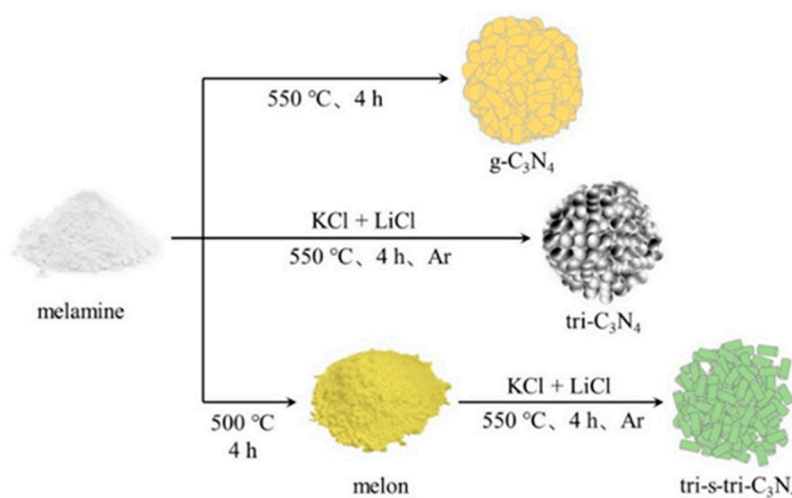

**Figure S1.** Synthesis roadmap of g-C<sub>3</sub>N<sub>4</sub>, tri-C<sub>3</sub>N<sub>4</sub> and tri-s-tri-C<sub>3</sub>N<sub>4</sub>.

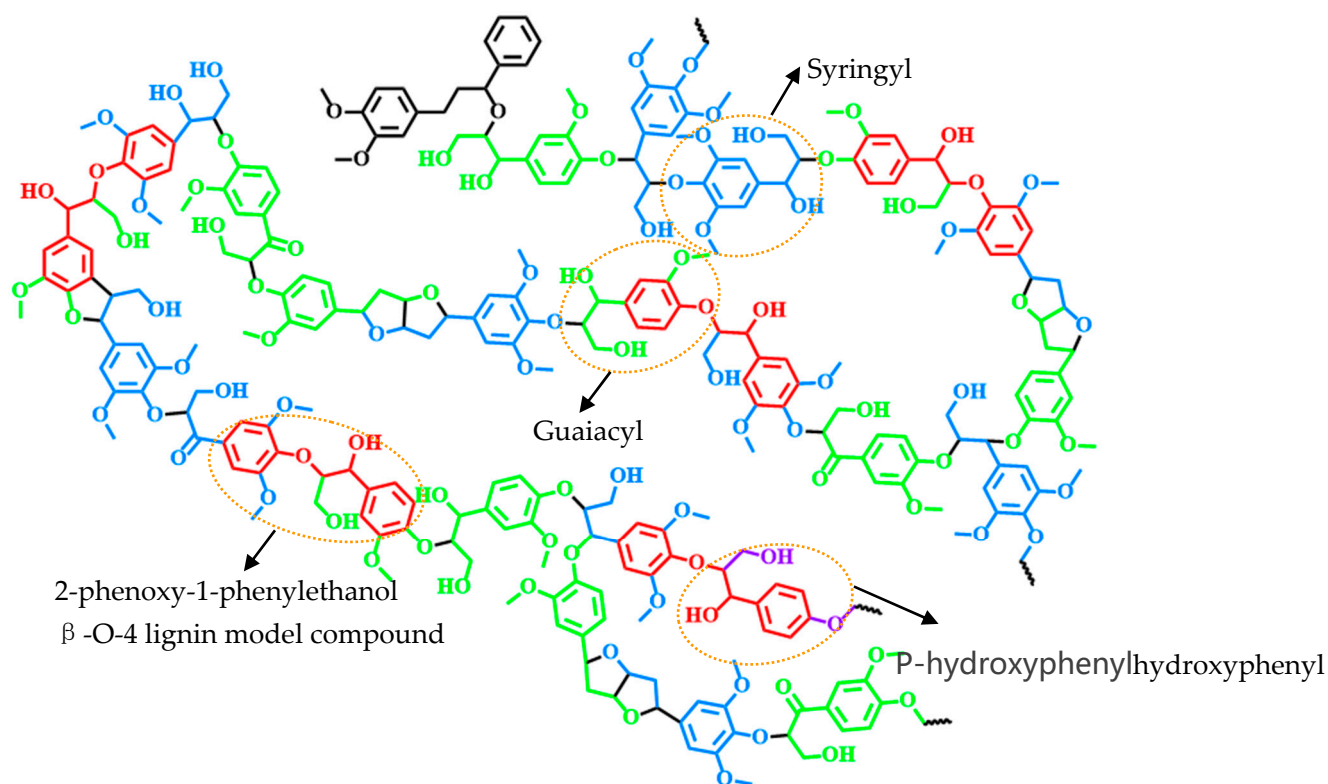

**Figure S2.** Structure diagram of lignin extracted from *Camellia oleifera* shell [2].

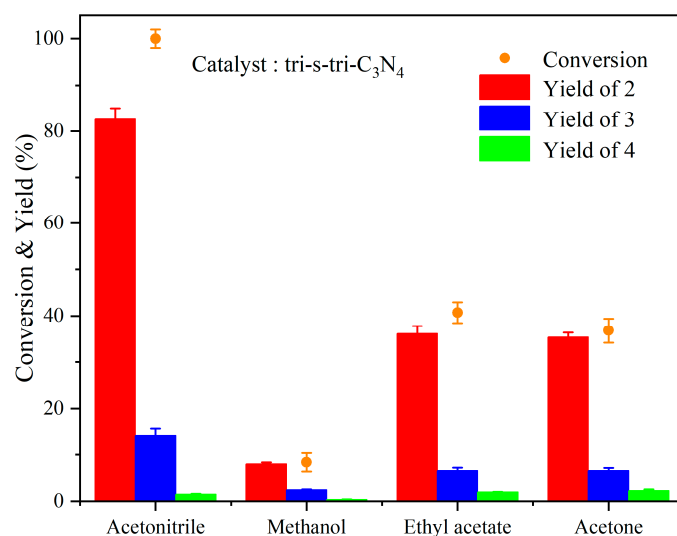

**Figure S3.** Conversion and product yield of photocatalytic conversion ML of tri-s-tri-C<sub>3</sub>N<sub>4</sub> in different organic solvents.

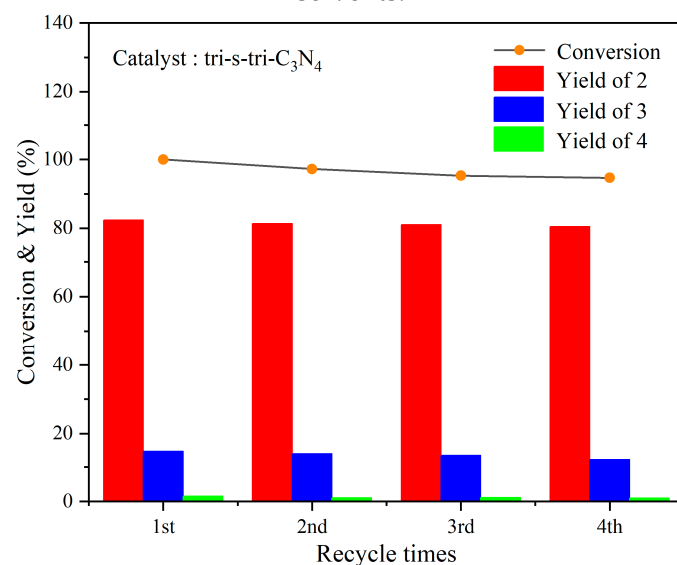

**Figure S4.** Recycles experiment of tri-s-tri-C<sub>3</sub>N<sub>4</sub>.

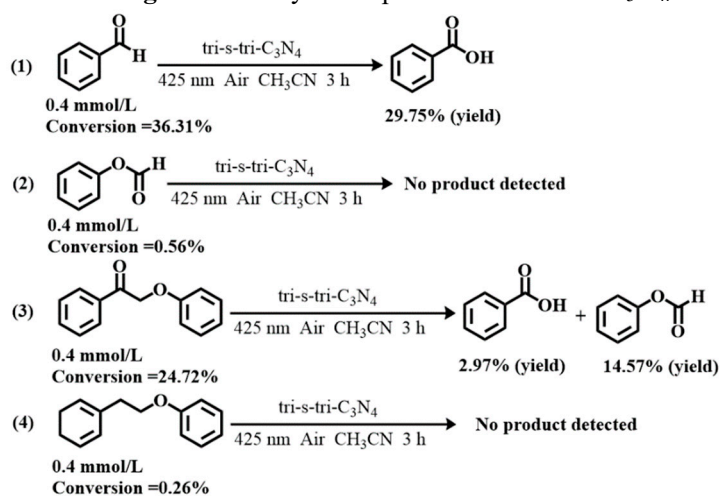

**Figure S5.** Photocatalytic reaction results of lignin model compound with different structures.

## Supplementary Tables

**Table S1.** The fluorescence attenuation components of fitted g-C<sub>3</sub>N<sub>4</sub>, tri-C<sub>3</sub>N<sub>4</sub> and tri-s-tri-C<sub>3</sub>N<sub>4</sub>.

| Photocatalysts                          | $\tau_1$ (ns) | Rel % | $\tau_2$ (ns) | Rel % | Ave. $\tau$ (ns) |
|-----------------------------------------|---------------|-------|---------------|-------|------------------|
| g-C <sub>3</sub> N <sub>4</sub>         | 1.0852        | 89.50 | 29.6577       | 10.50 | 4.0853           |
| tri-C <sub>3</sub> N <sub>4</sub>       | 0.8381        | 48.34 | 5.3558        | 51.66 | 3.1719           |
| tri-s-tri-C <sub>3</sub> N <sub>4</sub> | 0.1924        | 60.79 | 3.2833        | 39.21 | 1.4043           |

### References

1. Ku, C.H.; Guo, H.Q.; Li, K.X.; Wu, Q.; Yan, L.S. One-step fabrication of mesoporous sulfur-doped carbon nitride for highly selective photocatalytic transformation of native lignin to monophenolic compounds. *Chin. Chem. Lett.* **2023**, *34*(1); 107298.
2. Chen, Y.F. Step-by-step hydrothermal preparation of carbon microspheres in *Camellia oleifera* seed shell and study on the mechanism of spherical formation. *Master's thesis, Nanchang Hangkong University.* **2020**, <http://doi:10.27233/d.cnki.gnchc.2020.000296>.
